# Supplementary material for: Structure-guided functional studies of plasmid-encoded dihydrofolate reductases reveal a common mechanism of trimethoprim resistance in Gram-negative pathogens
Source: PubMed Central journal article supplement (PMC9106665; doi:10.1038/s42003-022-03384-y), 2022-05-13
Supplement: 42003_2022_3384_MOESM2_ESM.pdf [file 42003_2022_3384_MOESM2_ESM.pdf]

## **Structure-guided functional studies of plasmid-encoded dihydrofolate reductases reveal a common mechanism of trimethoprim resistance in Gram-negative pathogens**

Jolanta Krucinska<sup>1</sup>, Michael N Lombardo<sup>1</sup>, Heidi Erlandsen<sup>2</sup>, Alexavier Estrada<sup>1</sup>, Debjani Si<sup>1</sup>, Kishore Viswanathan<sup>1</sup>, Dennis L Wright<sup>1\*</sup>

<sup>1</sup>Department of Pharmaceutical Sciences, University of Connecticut, 69 N. Eagleville Rd., Storrs, Connecticut 06269, United States

<sup>2</sup> Center for Open Research Resources & Equipment (COR<sup>2</sup>E), University of Connecticut, 91 N. Eagleville Rd., Storrs, Connecticut 06269, United States

a

```
dfrA18 -----MSHPQLRLIIVA-VDSKLGFGKGGKIIPWK-CKEDMARFTRISKEIRVC 45
dfrA19 -----MSHPQLRLIIVA-VDSKLGFGKGGKIIPWK-CKEDMARFTRISKEIRVC 45
dfrA23 -----MPTIEIIVA-VDPGGFGRNGQIIPWT-CKEDMKRFTRISKEIRVC 43
dfrA1C -----MNISLIFANELITRAFIGNQGLIPWQFIKEDMQFFQKTTE-NSV 43
dfrA24 ---MTY-QLDVSKILSFDLEAIVA-ATENGGIYXGDLIPWR-LQGDILKRFREITQ-GGIV 53
dfrA8 -----MIELHAILLA-ATANGCIGKONALIPWPLLKGDILAREFKKLTM-GKVV 43
dfrA6 -----MKISIMAAA-VSENGVIGSGLEIIPWH-VYGEQLLEFKAMTY-NHWL 41
dfrA31 -----MKISIMAAA-VSENGVIGSGLEIIPWH-VQGEQLLEFKAMTY-NHWL 41
dfrA7 -----MKISLISA-TSENGVIGKGPDIIPWS-AKGEQLLEFKALTY-NQWL 41
dfrA17 -----MKISLISA-VSENGVIGSGPDIIPWS-VKGEQLLEFKALTY-NQWL 41
dfrA32 -----MKISLISA-VSENGVIGSGPDIIPWS-AKGFQLIFFKALTY-NQWL 41
dfrA28 -----MVA-ISKNGVIGNGPDIIPWS-AKGEQLLEFKALTY-NQWL 36
dfrA1 -----MKLSLMAVA-ISKNGVIGNGPDIIPWS-AKGEQLLEFKALTY-NQWL 41
dfrA11 -----MKLSLMAVA-TSKNGVTGNPDIIPWS-AKGFQLIFFKALTY-NQWL 41
dfrA15 -----MKLSLMAVA-ISKNGVIGNGPDIIPWS-AKGEQLLEFKALTY-NQWL 41
dfrA27 -----MKISLMAAA-KARNGVIGCGSDIIPWN-AKGEQLLEFKALTY-NQWL 41
dfrA25 -----MAA-RAKNGVIGCGPDIIPWS-AKGFQLIFFKALTY-NQWL 36
dfrA29 -----MAA-RAKNGVIGCGPDIIPWS-AKGEQLLEFKALTY-NQWL 36
dfrA14 -----MRTLKVSLLMAA-KAKNGVIGCGPDIIPWS-AKGEQLLEFKALTY-NQWL 44
dfrA16 -----MRTLKVSLLMAA-KAKNGVIGCGPDIIPWS-AKGEQLLEFKALTY-NQWL 44
dfrA5 -----MKVSLMAA-KAKNGVIGCGPDIIPWS-AKGEQLLEFKALTY-NQWL 41
dfrA3C -----MKVSLMAA-RAKNGVIGCGPDIIPWS-AKGEQLLEFKALTY-NQWL 41
dfrA2C -----MGIKXSLIVA-IGKHREMGADNCLLWH-LPRDMQFFKETT-TT-GHAV 43
dfrA9 -----MASLNMIVA-VNKTGGIYGFENQIIPWH-EPEDILKHFKAVTM-NSVL 42
dfrA2 -----MNSESVRIYLVAA-MGANRVIGNGPDIIPWK-IPGGEQKIFRRLTE-GKVV 46
dfrA12 -----MNSESVRIYLVAA-MGANRVIGNGPDIIPWK-IPGGEQKIFRRLTE-GKVV 46
dfrA22 -----MNPELVRIYLVAA-MGANRVIGNGPDIIPWK-IPGGEQKIFRRLTE-GKVV 46
dfrA13 -----MNPESVRIYLVAA-MGANRVIGNGPDIIPWK-IPGGEQKIFRRLTE-SKVV 46
dfrA21 -----MNPESVRIYLVAA-MGANRVIGNGPDIIPWK-IPGGEQKIFRRLTE-SKVV 46
dfrA26 MADREYDPLIDDDMEDAXVAVTAA-RAQNGCTGRHGKIPWK-LPGDILKYFRERTW-GKPT 57
dfrA3 -----MLISLISA-LAHNNLIGKDKLIIPWH-LPADLRHFKAVTL-GKPV 41
TQDHFR -----MTSLTAA-LAVDRVIGMEXAMIPWN-LPADLAWFKRNTL-DKPV 40
```

```
dfrA18 VIGKHTYTDMRDMQLEKDGAEERIKKGIIPERESFVISSTLK---QEDVIGATVVPDL 101
dfrA19 VIGKHTYTDMRDMQLEKDGAEERIKKGIIPERESFVISSTLK---QEDVIGATVVPDL 101
dfrA23 VMGKNTYKDMLODMQMKKDGAEERIKKGIIPERESYVVSSTLK---PEDVIGATVVPDL 99
dfrA1C VMGLNTPWRSLLPKM-----KLLGRDFVISSTITEHEV--LNNNIQIFKSF 86
dfrA24 IMGAGTYKSLP-----SPLKDRINIVITKKSE-ISWTA-CYDVRVNSP 95
dfrA8 IMGRRKTYESLP-----VKLEGRTCIVMTRQALELPGVRDANGAIFVNNV 87
dfrA6 LVGRKTFDSMG-----KLPNRKYAVVIRTE---MVSNDPDDVYFISV 80
dfrA31 LVGRKTFDSMG-----KLPNRKYAVVTRSE---MVSNDPDDVYFISV 80
dfrA7 LVGRKTFDSMG-----VLPNRKYAVVSRKG---ISSSNENVLVFPSI 80
dfrA17 LVGRKTFDSMG-----VLPNRKYAVVSKNG---ISSSNENVLVFPSI 80
dfrA32 LVGRKTFDSMG-----VLPNRKYAVVSKNG---ISGSNENVLVFPSI 80
dfrA28 LVGRKTFESMG-----ALPNRKYAVVTRSS---LTSNENNVIFPSI 75
dfrA1 LVGRKTFESMG-----ALPNRKYAVVIRSS---FTSDNENVLIFPSI 80
dfrA11 LVGRKTFESMG-----ALPNRKYAVVTRSS---FTSDNENVLIFPSI 80
dfrA15 LVGRKTFESMG-----ALPNRKYAVVTRSS---FTSDNENVLVFPSI 80
dfrA27 LVGRKTFEAMG-----ALPNRKYAVVSRSG---SVATNDDDVVVPSI 80
dfrA25 LVGRKTFESMG-----PLPNRKYAVVTRSK---WTAANENVVVFPSI 75
dfrA29 LVGRKTFESMG-----PLPNRKYAVVTRSK---WTAANENVVVFPSI 75
dfrA14 LVGRKTFESMG-----ALPNRKYAVVTRSG---WTSNDDNVVVFQSI 83
dfrA16 LVGRKTFESMG-----ALPNRKYAVVTRSG---WTSNDDNVVVFQSI 83
dfrA5 LVGRKTFESMG-----ALPNRKYAVVTRSA---WTAADNDNVVVFPSI 80
dfrA3C LVGRKTFESMG-----ALPNRKYAVVTRSA---WTANNDDNVVVFPSI 80
dfrA2C VMGRKSWESI PQKY-----RPLPNRLNFVLTRODN---Y--SAEGATVIYDL 85
dfrA9 IMGRRKTFASLP-----KVLPGRLHVVVSKTVP---PTQNTDQVVVSTY 83
dfrA2 VMGRKTFESI G-----KPLPNRHTLVISRQAN---Y--RATGCVVSTL 85
dfrA12 VMGRKTFESI G-----KPLPNRHTLVISRQAN---Y--RATGCVVSTL 85
dfrA22 VMGRKTFESI G-----KPLPNRRTVVLISRQAS---Y--SAGCAVVSTL 85
dfrA13 VMGRKTFESI G-----KPLPNRHTVVLISRQAG---Y--SAPGCAVVSTL 85
dfrA21 VMGRKTFESI G-----KPLPNRHTVVLISRQAA---Y--SAPGCAVVSTL 85
dfrA26 TMGRKTPWRSLLPKM-----GALPGRTNTVVTTRQQG---Y--FAFGARVVDST 96
```

dfrA3 VMGRRTTFESIG-----RPLPGRNRVVVSRNPQ---W---QAEQVEVA?SL 80  
ScDHRF IMGRHTTWESIG-----RPLPGRKNIIILSSQPG---T---DD-RVTWVKS V 78

dfrA18 RAVINL-----Y-----ENTDQRIAVIIGGEKLYIQALSS--ATKLLHMTIIPREFD--CDR 147  
dfrA19 RAVINL-----Y-----ENTDQRIAVIIGGEKLYIQALSS--ATKLLHMTIIPREFD--CDR 147  
dfrA23 RAVLNK-----Y-----HDSQDRIAVIIGGEKLYVQALAS--AKKVHLTVMPRSYK--CDR 145  
dfrA1C ESFLA-----F-----RDTTKPINVIIGGVGLLSEATEH--ASTVYMSIHMVKPVHADV 134  
dfrA24 EDALRMVGRIDEKEEQGRDRPRVFIIGGASIIYQALMPF--VSTLHWTEVHVEQL-PEEI 152  
dfrA8 SDAMRFAQ-----S-----SSVGDVAVVIIGGAEIIFKRLALM--ITQIELTFVKKRLYE--GDT 135  
dfrA6 ESALAY-----L-----DHTTTHVFIIGGGEIYKALIEQ--ADVIHLSVIHKHIS--GDV 126  
dfrA31 ESALSY-----L-----DNTTTHVFIIGGGEIYKALIEQ--ADVIHLSVIHKHIS--GDV 126  
dfrA7 EIALQE-----L-----SKITDHLVFIIGGGQIYNSLIEK--ADIIHLSTVHVEVE--GDI 126  
dfrA17 ENALKE-----L-----SKVTDHVFIIGGGQIYNSLIEK--ADIIHLSTVHVEVE--GDI 126  
dfrA32 ENALQE-----L-----SKITDHLVFIIGGGQIYESLIEK--ADIIHLSTVHVEVE--GDI 126  
dfrA28 KDALTN-----L-----KKITDHLVFIIGGGEIYKSPIDQ--VDTLHISTIDIEPE--GDV 121  
dfrA1 KDALTN-----L-----KKITDHLVFIIGGGEIYKSLIDQ--VDTLHISTIDIEPE--GDV 126  
dfrA11 KDALTN-----L-----KKITDHLVFIIGGGEIYKSLIDQ--VDTLHISTIDIEPE--GDV 126  
dfrA15 DEALNH-----L-----KTIIDHLVFIIGGGEIYKSLIDK--VDTLHISTIDIEPE--GDV 126  
dfrA27 EAAMRE-----L-----XTLTNHVFIIGGGEIYKSLIAH--ADTLHISTIDSEPE--GNV 126  
dfrA25 DEAMGR-----L-----GEITDHLVFIIGGGEIYHETIPM--ASTLHVSTIDVEPE--GDV 121  
dfrA29 DEAMGR-----L-----GEITDHLVFIIGGGEIYHETIPM--ASTLHVSTIDVEPE--GDV 121  
dfrA14 EEAMDR-----L-----AEFTGHVFIIGGGEIYRETLPM--ASTLHLSTIDIEPE--GDV 129  
dfrA16 EEAMDR-----L-----AEFTGHVFIIGGGEIYRETLPM--ASTLHLSTIDIEPE--GDV 129  
dfrA5 EEAMYG-----L-----AELTDHLVFIIGGGEIYRETLPM--ASTLHISTIDIEPE--GDV 126  
dfrA3C EEAMGG-----L-----AKLNHGVFIIGGGEIYRETLPM--ASTLHVSTIDIEPE--GDV 126  
dfrA2C KEVAQH-----L-----EGKNLTCFTIIGGAQIYQLALLETGLLNEMYVTVQVHNTFE-EADT 134  
dfrA9 QIAVRTASLLVD-----KPEYSQIFVIIGGKSAYENLAAY--VCKLYLTRVQLNTQ--QDT 134  
dfrA2 SHAIALA-----L-----SELGNLHYVFIIGGAEIYTLALPH--ANGVFLSEVHQTFE--GDA 131  
dfrA12 SHATAA-----L-----SEIGNKLYVFIIGGAEIYTLALPH--ANGVFLSEVHQTFE--GDA 131  
dfrA22 SQAIIA-----L-----AEHGKELYVFIIGGAEVYALALPR--ANGVFLSEVHQTFE--GDA 131  
dfrA13 SHVSPST-----L-----AEHGKELYVFIIGGAEVYALALPH--ANGVFLSEVHQTFE--GDA 131  
dfrA21 SQAIIA-----L-----AEHGKELYVFIIGGAEVYALALPH--ANGVFLSEVHQTFE--GDA 131  
dfrA26 EEALISLAQSIAL-----IEAVDEIMVFIIGGGEIYTYQALPQ--ADILYLTEVHASVD--GDA 147  
dfrA3 DAAL-----L-----LTDCEEAMIIIGGGQLYAEALPR--ACRLYLTYIDAQLN--GDT 125  
ScDHRF DEAI-----AA-----CGDVPEIMVFIIGGGRVYEQFLPX--AQKLYLTHIDA EVE--GDT 123

dfrA18 FIPVDPIQNNFPHIDSSASE--TVEATV---DETQERIHAFATYVRNNQ----- 189  
dfrA19 FIPVDPIQNNFPHIDSSASE--TVEATV---DETQERIHAFATYVRNNQ----- 189  
dfrA23 FLPMYSYIDSKFAIGQGS-I--TIQTIV---DGETHPVKFITYSRVQP----- 186  
dfrA1C YVPVELMKNKLYSDPKYPENILWVGDPIDS---VYSLIDKFRVPAASLVGVVNDINT--- 187  
dfrA24 GLDTYI--EDFLSLR-----GTSTPK-----RKSNLVLPPTPTTP--- 185  
dfrA8 YVDLAEMVKDYEQNG-----MEHDL-----HTYFTYR---KKELTE----- 169  
dfrA6 FFP SV-P-QSFKQTF-----EQSFSS---NIDYTYQIWKKG----- 157  
dfrA31 FFP SV-P-QSFKQTF-----EQSFSS---NIDYTYQIWKKG----- 157  
dfrA7 NFPKI-P-ENFNLFV-----EQFFLS---NINXYTYQIWKKG----- 157  
dfrA17 KFPIM-P-ENFNLFV-----EQFFMS---NINXYTYQIWKKG----- 157  
dfrA32 KFPIL-P-EGFNLFV-----EQFFVS---NINXYTYQIWKKG----- 157  
dfrA28 YFPES-P-AILGQ-F-----YPLRS---NINYSYQIWKQK----- 166  
dfrA1 YFPEI-P-SNFRPVF-----TQDFAS---NINYSYQIWKQK----- 157  
dfrA11 YFPEI-P-SNFRPVF-----TQDFAS---NINYSYQIWKQK----- 157  
dfrA15 YFPEI-P-SSFRPVF-----SQDFVS---NINYSYQIWKQK----- 157  
dfrA27 FFP EI-P-KEFNLVF-----EQEFS---NINXYRYQIWKQK----- 157  
dfrA25 FFP NI-P-GKFDVVF-----EQFTS---NINXYCYQIWKQK----- 152  
dfrA29 FFP NI-P-GKFDVVF-----EQFTS---NINXYCYQIWKQK----- 152  
dfrA14 FFP SI-P-NTFEVVF-----EQHETS---NINXYCYQIWKQK----- 160  
dfrA16 FFP SI-P-NTFEVVF-----EQHETS---NINXYCYQIWKQK----- 160  
dfrA5 FFP NI-P-NTFEVVF-----EQHFS---NINXYCYQIWKQK----- 157  
dfrA3C FFP NI-P-NFEEVVF-----EQHFS---NINXYCYQIWKQK----- 157  
dfrA2C FFP VNW-GEWEED-----ILEQDKDEKHLVSNIKKFTF----- 169  
dfrA9 ELDSL-F-KSWKLVS-----EVPITEN--KTKLIFQIWINPNI--SEEPTC--- 177  
dfrA2 FFPMLNE-TEFELVS-----TETIQA---VLPYTHSVYARRNG----- 165  
dfrA12 FFPMLNE-TEFELVS-----TETIQA---VLPYTHSVYARRNG----- 165  
dfrA22 FFPVLE-DEFVVS-----AETVQA---TITYTHSVYARRNG----- 165

|        |                                                  |     |
|--------|--------------------------------------------------|-----|
| dfrA13 | FFPVLNA-AEFEVVS-----SETIQG---TITYTHSVYARRNG----- | 165 |
| dfrA21 | FFPVLNA-AEFEVVS-----SETIQG---TITYTHSVYARRNG----- | 165 |
| dfrA26 | FFPDVDL-SQYQETQ-----RQDFEPSGGNPYPFSFVVYQRT-----  | 183 |
| dfrA3  | HFPDYLS-LGWQELE-----RSTHPADDKNSYACEFVTLRQR-----  | 162 |
| ScDHFR | HFPDYEP-DDWESVF-----SEPHDADAQNSHSYCFEILERR-----  | 159 |

|        |             |     |
|--------|-------------|-----|
| dfrA18 | -----       | 189 |
| dfrA19 | -----       | 189 |
| dfrA23 | -----       | 186 |
| dfrA10 | -----       | 187 |
| dfrA24 | -----       | 185 |
| dfrA8  | -----       | 169 |
| dfrA6  | -----       | 157 |
| dfrA31 | -----       | 157 |
| dfrA7  | -----       | 157 |
| dfrA17 | -----       | 157 |
| dfrA32 | -----       | 157 |
| dfrA28 | V A S L A G | 172 |
| dfrA1  | -----       | 157 |
| dfrA11 | -----       | 157 |
| dfrA15 | -----       | 157 |
| dfrA27 | -----       | 157 |
| dfrA25 | -----       | 152 |
| dfrA29 | -----       | 152 |
| dfrA14 | -----       | 160 |
| dfrA16 | -----       | 160 |
| dfrA5  | -----       | 157 |
| dfrA30 | -----       | 157 |
| dfrA20 | -----       | 169 |
| dfrA9  | -----       | 177 |
| dfrA2  | -----       | 165 |
| dfrA12 | -----       | 165 |
| dfrA22 | -----       | 165 |
| dfrA13 | -----       | 165 |
| dfrA21 | -----       | 165 |
| dfrA26 | -----       | 183 |
| dfrA3  | -----       | 162 |
| ScDHFR | -----       | 159 |

**b**

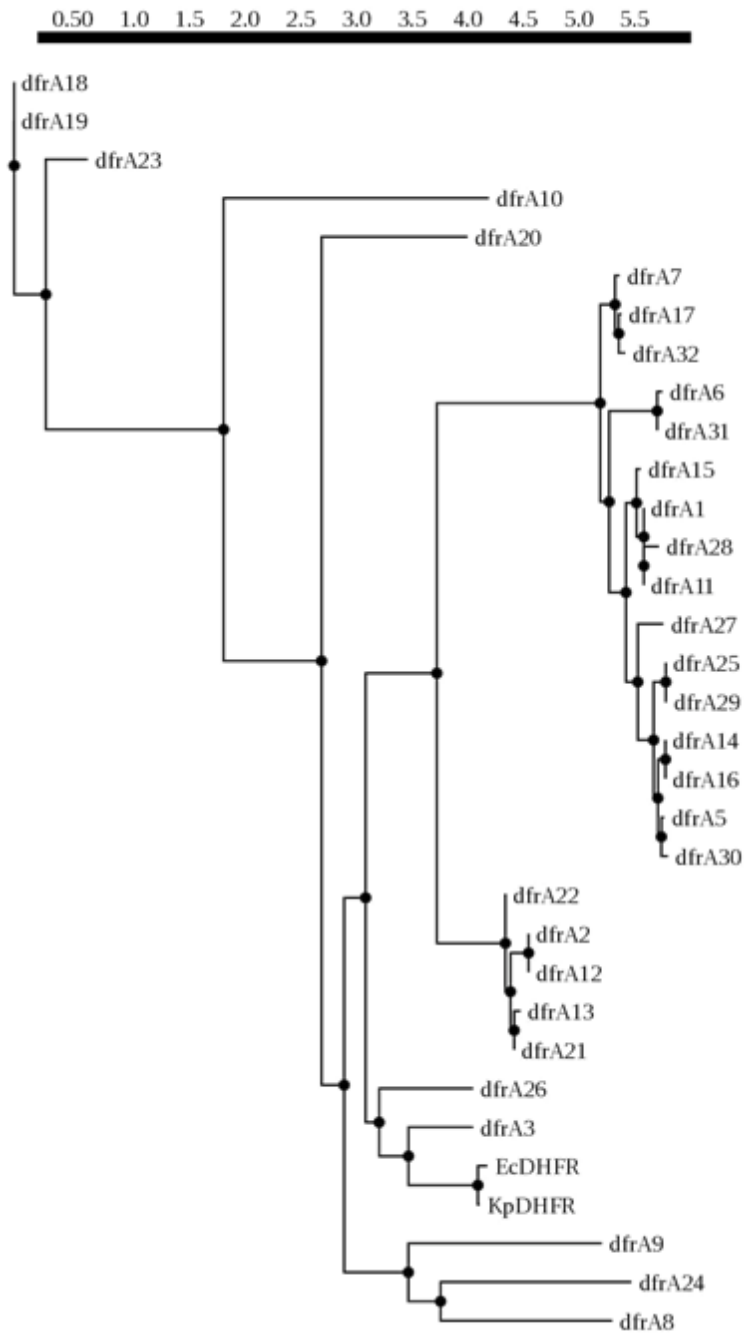

**Supplementary Figure S1. Multiple sequence alignment of amino acid sequences by MUSCLE and a phylogenetic tree built off the standard Likelihood Ratio Test for all DfrA isoforms.**

**a** A sequence alignment of all known DfrA enzymes and EcDHFR. Residues that interact with trimethoprim are boxed. **b** *K. pneumoniae* DHFR (KpDHFR) was used as a positive control in building the phylogenetic tree given the close relation to EcDHFR. Phylogenetic analysis was based on the sequence alignment.

| <i>E. coli</i> DHFR Mutant T <sub>i</sub> (°C) |                  |                  |                  |
|------------------------------------------------|------------------|------------------|------------------|
|                                                | T <sub>i</sub> 1 | T <sub>i</sub> 2 | T <sub>i</sub> 3 |
| WT                                             | 50.6 ± 1.7       | 58.7 ± 0.5       | 62.3 ± 2.5       |
| D27E                                           | 51.9 ± 1.7       | 62.1 ± 1.3       | -                |
| L28Q                                           | 52.0 ± 1.2       | 57.7 ± 0.8       | 63.9 ± 1.2       |
| D27E/<br>L28Q                                  | 55.8 ± 0.8       | 62.0 ± 0.6       | 66.1 ± 2.1       |

**Supplementary Table S1. Thermal unfolding data of EcDHFR wild type and its mutants.**

Data is shown as mean ± standard deviation for n = 2 independent replicates.

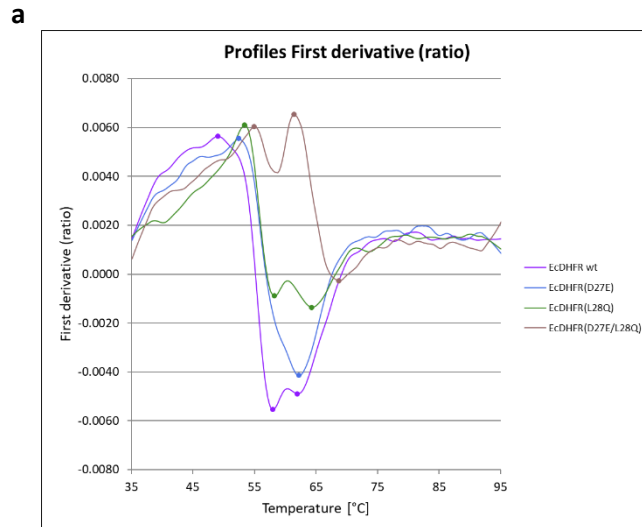

**Supplementary Figure S2. Thermal stability of dihydrofolate reductases measured with label-free differential scanning fluorimetry.** The first derivative of the fluorescence ratio ( $\Delta F_{350nm}/\Delta F_{330nm}$ ) as a function of temperature are shown in the diagrams. Colored points represent  $T_i$  (inflection temperature at which an unfolding transition occurs). Maxima and minima indicate a transition point along the melting curve. Experiments were performed with two independent samples and one representative data for each sample is displayed. **a** Thermal unfolding profile of the wild-type *E. coli* DHFR (*EcDHFR*) (brown), *EcDHFR*(D27E) (blue) and *EcDHFR*(L28Q) (green) single mutants and *EcDHFR* (D27E/L28Q) (purple) double mutant.

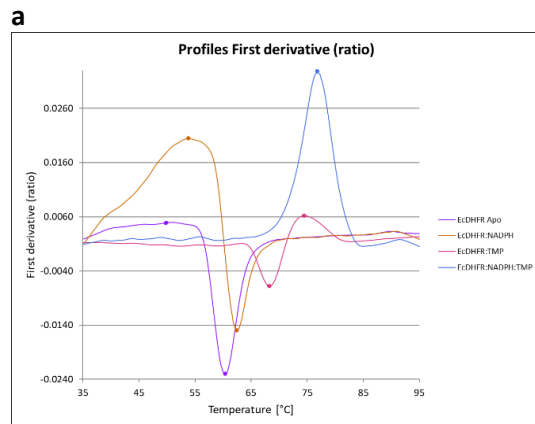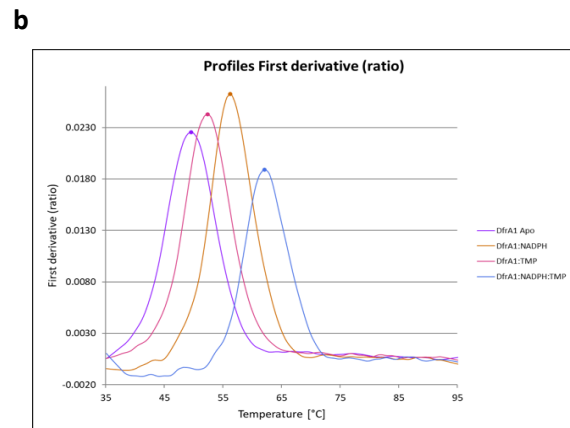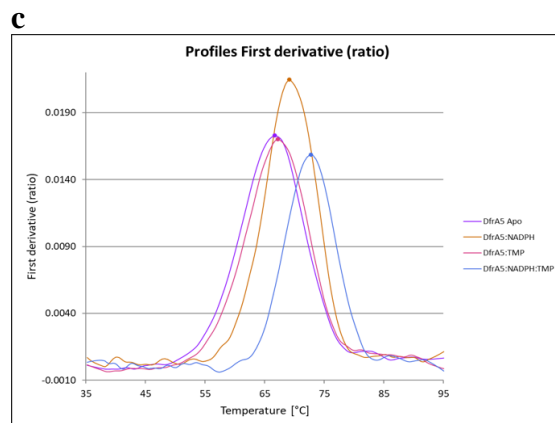

**Supplementary Figure S3. Thermal stability profile of wild-type E. coli DHFR (EcDHFR), DfrA1 and DfrA5 upon binding to TMP in presence and absence of co-factor.** Representative first derivative plots are shown for fluorescence ratio (350/330 nm) from which  $T_i$  values corresponding to the positive and negative peaks in the unfolding profile were determined (n=3). **a** Thermal shift first-derivative curves of EcDHFR Apo (purple), EcDHFR:NADPH (orange), EcDHFR:TMP (red), EcDHFR:TMP:NADPH (blue). **b** Thermal shift first-derivative curves of DfrA1 Apo (purple), DfrA1:NADPH (orange), DfrA1:TMP (red), DfrA1:TMP:NADPH (blue). **c** Thermal shift first-derivative curves of DfrA5 Apo (purple), DfrA5:NADPH (orange), DfrA5:TMP (red), DfrA5:TMP:NADPH (blue).

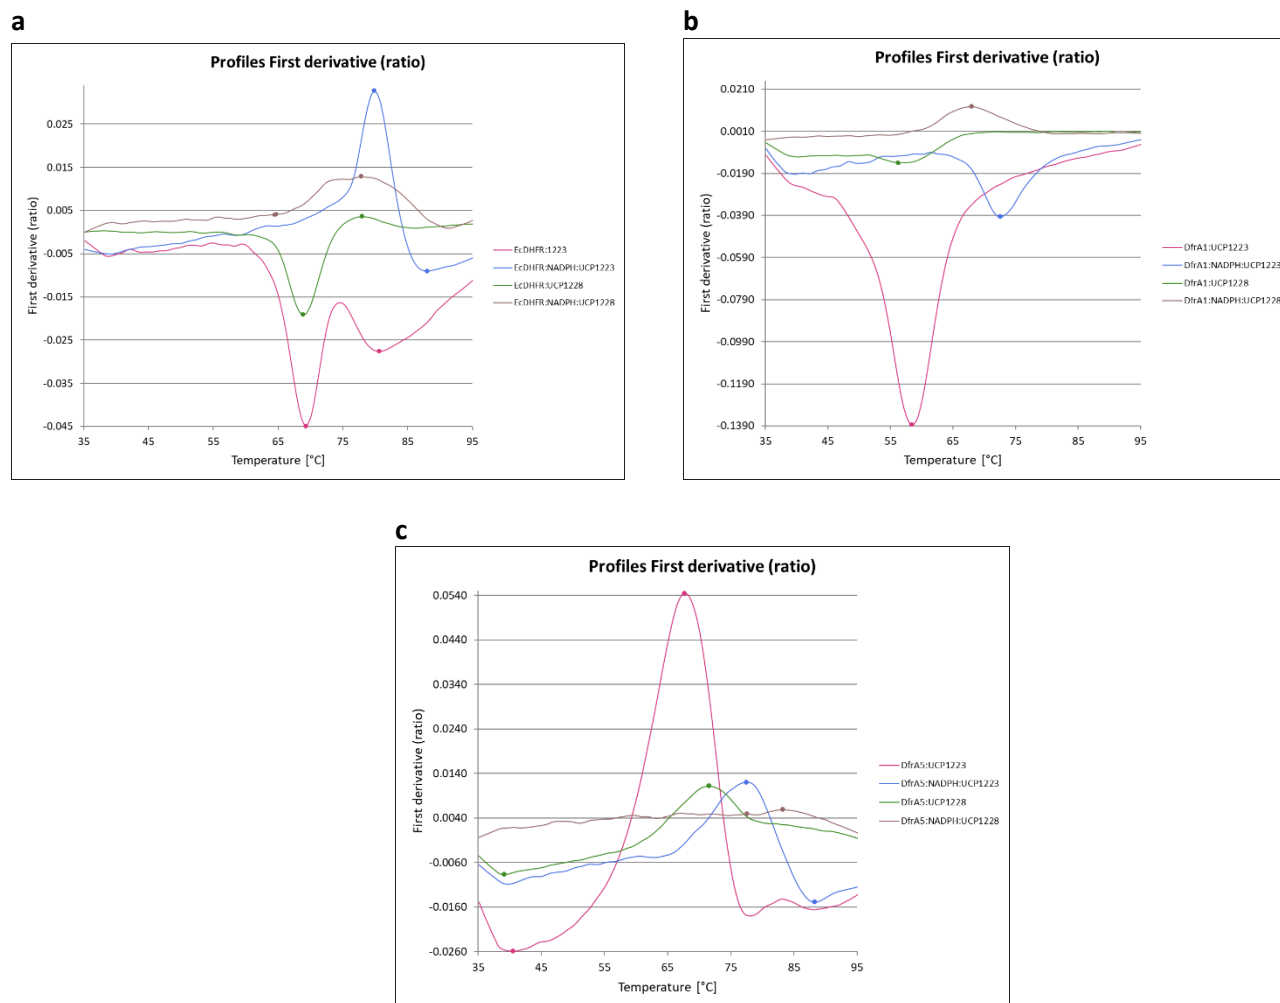

**Supplementary Figure S4. Thermal stability profile of wild-type E. coli DHFR (EcDHFR), DfrA1 and DfrA5 upon binding to UCP1223 and UCP1228 in presence and absence of co-factor.** Equivalent analysis for all three systems in the presence of PLAs as indicated (n=3). **a** Thermal shift first-derivative curves of EcDHFR:UCP1223 (red), EcDHFR:NADPH:UCP1223 (blue), EcDHFR:UCP1228 (green), EcDHFR:NADPH:UCP1228 (purple). **b** Thermal shift first-derivative curves of DfrA1:UCP1223 (red), DfrA1:NADPH:UCP1223 (blue), DfrA1:UCP1228 (green), DfrA1:NADPH:UCP1228 (purple). **c** Thermal shift first-derivative curves of DfrA5:UCP1223 (red), DfrA5:NADPH:UCP1223 (blue), DfrA5:UCP1228 (green), DfrA5:NADPH:UCP1228 (purple).



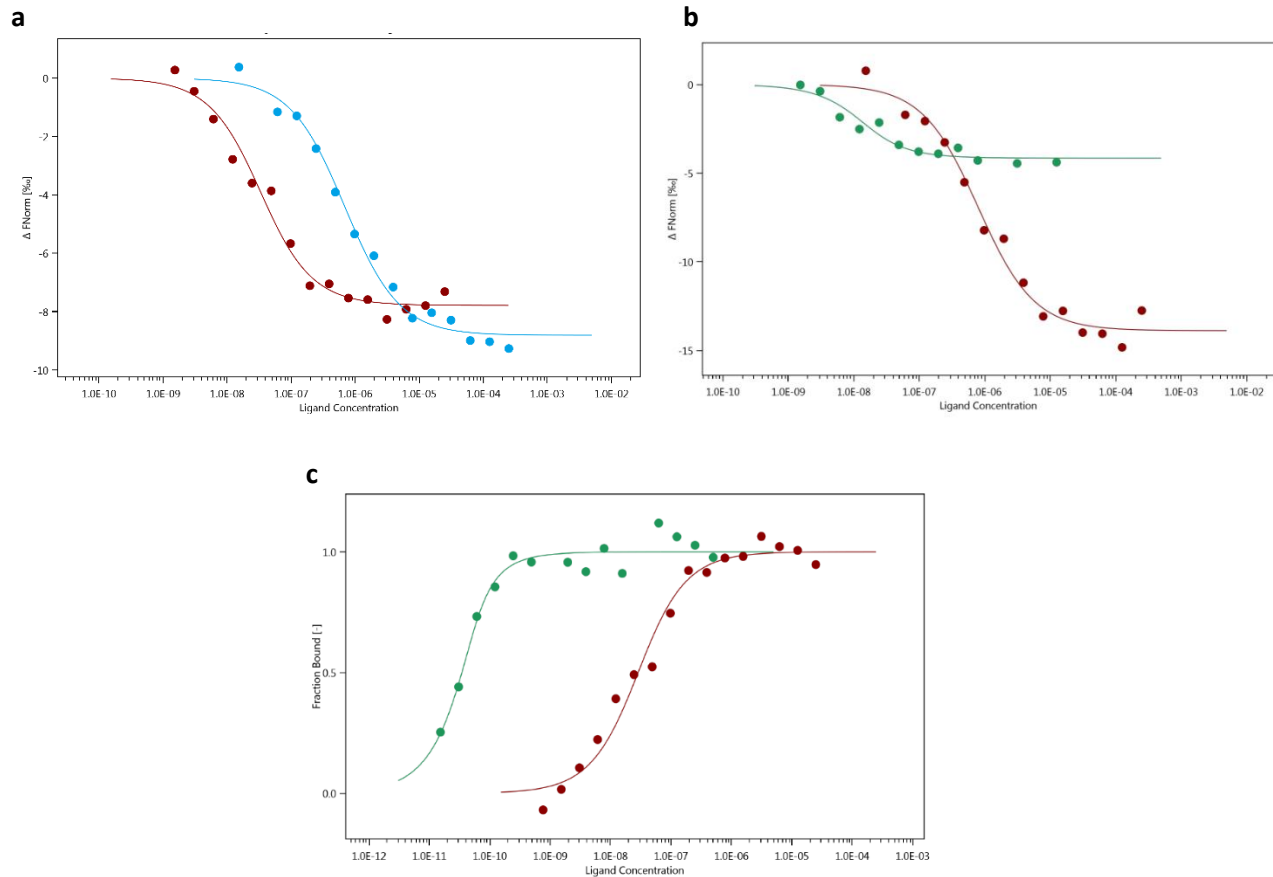

**Supplementary Figure S5. Thermophoretic analysis of *EcDHFR* interactions with NADPH and TMP by MST.** Normalized binding response ( $\Delta F_{\text{norm}}$  of fraction bound) of the increasing concentrations of the non-fluorescent ligand to the constant concentration of the red-NTA labeled enzyme. The experiments were performed using medium MST power and between 40 to 80% LED power, at 23 °C. The MST traces were recorded with the following parameters: 5 s MST power of, 30 s MST power on and 5 s MST power of. Data collection was performed with MO.Control 2 (Nano-temper Technology GmbH). The reported measurements are the combination of the fast, local environment dependent responses of the fluorophore to the temperature jump and the slower diffusive thermophoretic fluorescence changes for the enzyme, pre and post incubation step. Equilibrium binding curves are depicted as thick lines and dots are representing up to 16 concentration sampling schemes, expressed as individual data points. The Data were fitted to a single-site binding model accounting for ligand depletion. The  $K_d$  values obtained from the best fit are reported in Table 4. **a** Titration of 50 nM red-NTA labeled *EcDHFR* apo form into a serial dilution of NADPH (blue) and TMP (red) ranging from 250  $\mu\text{M}$  to 0.015  $\mu\text{M}$  and 25  $\mu\text{M}$  to 0.000763  $\mu\text{M}$  respectively. Fit of the changes in the thermophoresis signal yielded a  $K_d$  of 661 nM  $\pm$  98 nM for NADPH and 24.5 nM  $\pm$  8.2 nM for TMP. **b** Binding of NADPH to red-NTA labeled *EcDHFR* with and without 1  $\mu\text{M}$  TMP preincubation step. Shift in thermophoretic movement after titration of NADPH from 250  $\mu\text{M}$  to 0.015  $\mu\text{M}$  against 50 nM *EcDHFR* apo form resulted in  $K_d$  of 771  $\pm$  145 nM (red). Titration of NADPH from 12.5  $\mu\text{M}$  to 0.00153  $\mu\text{M}$  against 10 nM of the enzyme preincubated with TMP caused a less pronounced response in MST signal, yielding  $K_d$  of 8.1  $\pm$  4.0 nM (green). **c** Binding of TMP to red-NTA labeled *EcDHFR* in presence and absence of co-factor. Titration of TMP from 25  $\mu\text{M}$  to 0.0007  $\mu\text{M}$  against 50 nM apo enzyme yielded  $K_d$  of 23.57 nM  $\pm$  5.15 nM (red), while addition of TMP from 0.5  $\mu\text{M}$  to 0.000015  $\mu\text{M}$  to 10 nM labeled, pre-formed binary complex with NADPH gave  $K_d$  of 0.011nM  $\pm$  0.0075 nM (green). A high margin of error for the ternary binding events is due to a limitation of the instrument to accurately measure protein-ligand interactions in a low picomolar range.

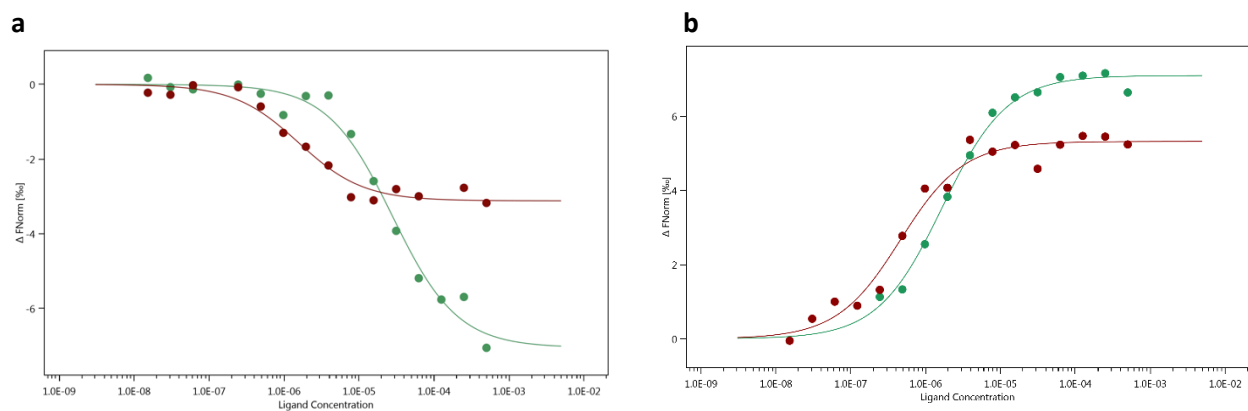

**Supplementary Figure S6. Thermophoretic analysis of DfrA1 interactions with NADPH and TMP by MST.** Equivalent analysis for DfrA1 as indicated. **a** Binding of NADPH to red-NTA labeled DfrA1 apo form and to preformed DfrA1:TMP complex. Titration of NADPH from 500  $\mu\text{M}$  to 0.0244  $\mu\text{M}$  against 50 nM DfrA1 apo form resulted in  $K_d$  of  $1.65 \pm 0.23 \mu\text{M}$  (green). Binding of NADPH from 500  $\mu\text{M}$  to 0.015  $\mu\text{M}$  to 50 nM DfrA1 preincubated with 100  $\mu\text{M}$  TMP yielded  $K_d$  of  $0.43 \pm 0.09 \mu\text{M}$  (red). **b** Binding of TMP to red-NTA labeled DfrA1 as a binary (DfrA1:TMP) and a ternary (DfrA1: NADPH:TMP) complex. Titration of TMP from 500  $\mu\text{M}$  to 0.015  $\mu\text{M}$  with 50 nM DfrA1 apo form gave  $K_d$  of  $27.79 \mu\text{M} \pm 4.87 \mu\text{M}$  (green), while addition of TMP from 500  $\mu\text{M}$  to 0.015  $\mu\text{M}$  against the same enzyme preincubated with 100  $\mu\text{M}$  NADPH gave  $K_d$  of  $1.53 \mu\text{M} \pm 0.36 \mu\text{M}$  (red).

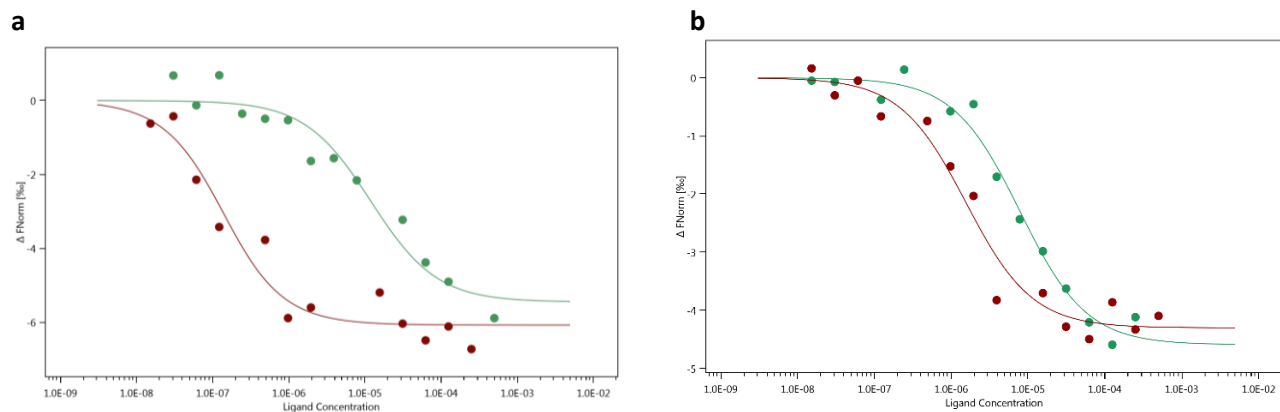

**Supplementary Figure S7. Thermophoretic analysis of DfrA5 interactions with NADPH and TMP.** Equivalent analysis for DfrA5 as indicated. **a** Binding of NADPH to red-NTA labeled DfrA5 apo form and to preformed DfrA5:TMP complex. Titration of NADPH from 500  $\mu\text{M}$  to 0.015  $\mu\text{M}$  against 50 nM labeled DfrA5 apo form yielded  $K_d$  of  $7.47 \pm 1.66 \mu\text{M}$  (green), while titration of NADPH against 50 nM labeled DfrA5 preincubated with 50  $\mu\text{M}$  TMP resulted in  $K_d$  equal  $1.54 \mu\text{M} \pm 0.38 \mu\text{M}$  (red). **b** Binding of TMP to red-NTA labeled DfrA5 apo form and to preformed DfrA5:NADPH complex. Titration of TMP from 500  $\mu\text{M}$  to 0.015  $\mu\text{M}$  against 50 nM labeled DfrA5 apo form yielded  $K_d$  of  $11.93 \mu\text{M} \pm 4.45 \mu\text{M}$  (green), while titration of TMP from 250  $\mu\text{M}$  to 0.015  $\mu\text{M}$  against 50 nM preformed complex of DfrA5 with 100  $\mu\text{M}$  NADPH derived a  $K_d$  value of  $0.113 \mu\text{M} \pm 0.056 \mu\text{M}$  (red).

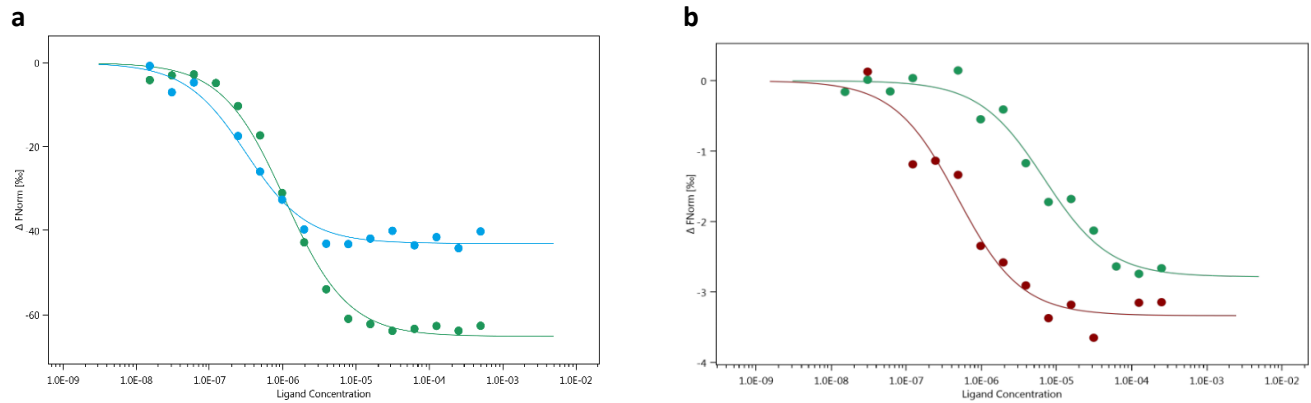

**Supplementary Figure S8. MST binding response of NADPH to preformed complexes of DfrA1 and DfrA5 with 100  $\mu\text{M}$  UCP1228 respectively.** By fitting the change in the thermophoretic movement upon titration of NADPH to a constant amount of the labeled enzyme alone and in the presence of UCP1228, a different binding constant of  $K_d$  was determined. **a** Binding of NADPH to red-NTA labeled DfrA1 in presence and absence of UCP1228. Titration of NADPH from 500  $\mu\text{M}$  to 0.015  $\mu\text{M}$  against 50 nM labeled DfrA1 apo form yielded  $K_d$  of  $1.04 \pm 0.11 \mu\text{M}$  (green), while titration of co-factor into 50 nM labeled protein preincubated with 100  $\mu\text{M}$  UCP1228 complex resulted in  $K_d$  equal to  $0.29 \mu\text{M} \pm 0.05 \mu\text{M}$  (blue). **b** Binding of NADPH to red-NTA labeled DfrA5 apo form and to preformed DfrA5:UCP1228 complex. Titration of NADPH from 250  $\mu\text{M}$  to 0.015  $\mu\text{M}$  against 50 nM labeled DfrA5 apo form yielded  $K_d$  of  $6.84 \mu\text{M} \pm 1.60 \mu\text{M}$  (green), while titration of NADPH from 250  $\mu\text{M}$  to 0.031  $\mu\text{M}$  against 50 nM labeled DfrA5 preincubated with 100  $\mu\text{M}$  UCP1228 derived a  $K_d$  value of  $0.45 \mu\text{M} \pm 0.15 \mu\text{M}$  (red).

| Protein             | Inhibitor    | Co-factor observed | Resolution (Å) | PDB ID |
|---------------------|--------------|--------------------|----------------|--------|
| <i>E. coli</i> DHFR | Trimethoprim | -                  | 2.4            | 7NAE   |
| <i>E. coli</i> DHFR | Trimethoprim | +                  | 3.0            | 7MYM   |
| <i>E. coli</i> DHFR | UCP1223      | -                  | 2.1            | 7REB   |
| <i>E. coli</i> DHFR | UCP1228      | -                  | 1.9            | 7MQP   |
| DfrA1               | Trimethoprim | -                  | 2.2            | 7MYL   |
| DfrA1               | UCP1223      | +                  | 1.4            | 7RGJ   |
| DfrA1               | UCP1228      | +                  | 1.8            | 7REG   |
| DfrA5               | Trimethoprim | +                  | 2.6            | 7R6G   |
| DfrA5               | UCP1223      | +                  | 2.2            | 7RGK   |
| DfrA5               | UCP1228      | +                  | 1.9            | 7RGO   |

**Supplementary Table S2. Summary of crystal structures described in this study**

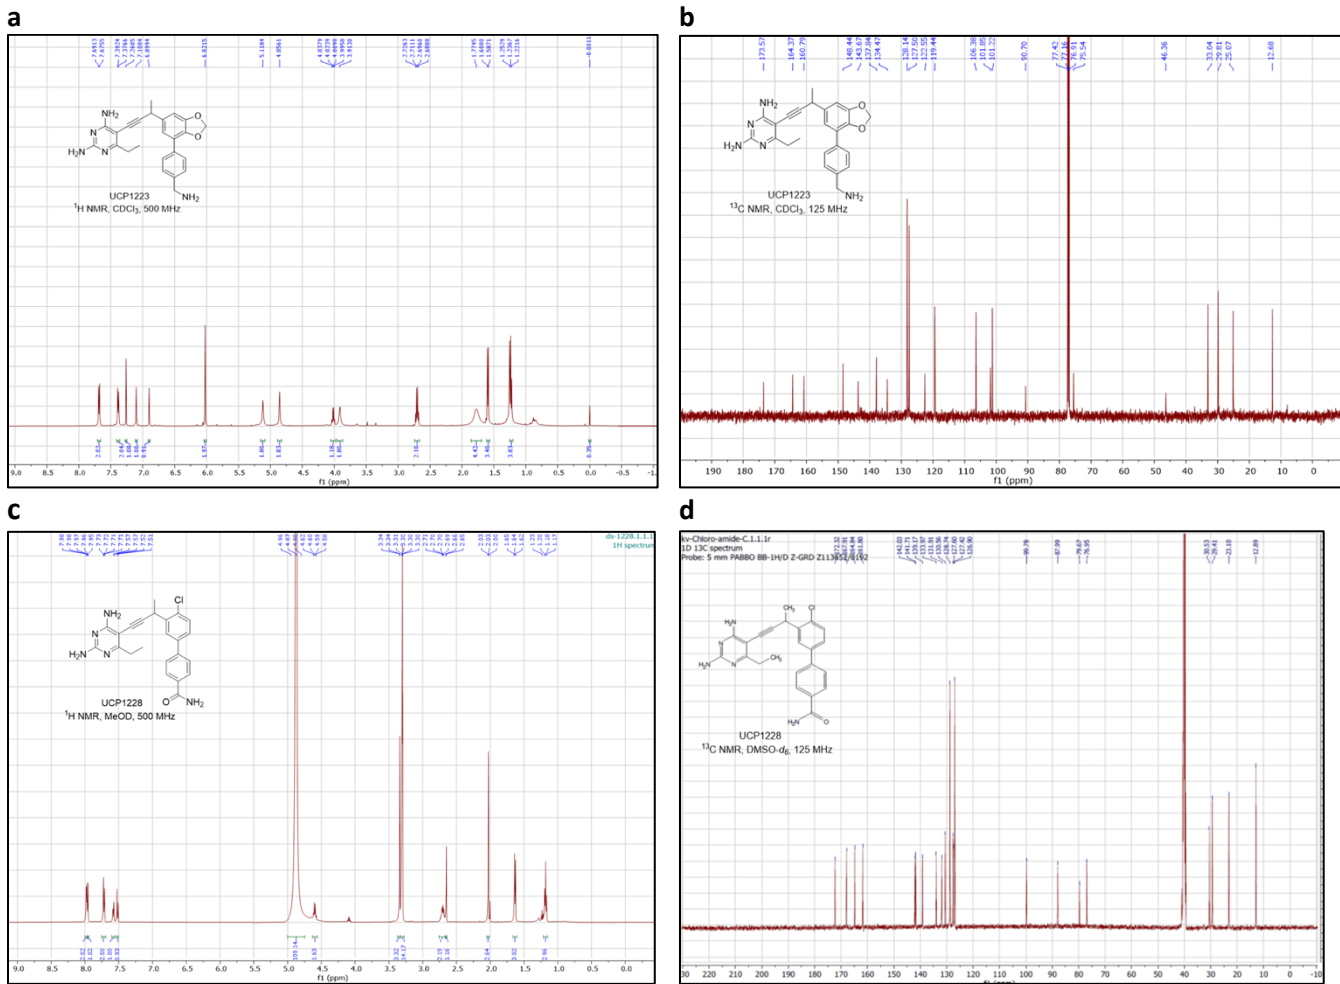

**Supplementary Figure S9. Characterization of UCP1223 and UCP1228 by <sup>1</sup>H and <sup>13</sup>C nuclear magnetic resonance (NMR). a <sup>1</sup>H and b <sup>13</sup>C NMR spectra of UCP1223 in CDCl<sub>3</sub>. c <sup>1</sup>H and d <sup>13</sup>C NMR spectra of UCP1228 in MeOD and DMSO-d<sub>6</sub> respectively.**

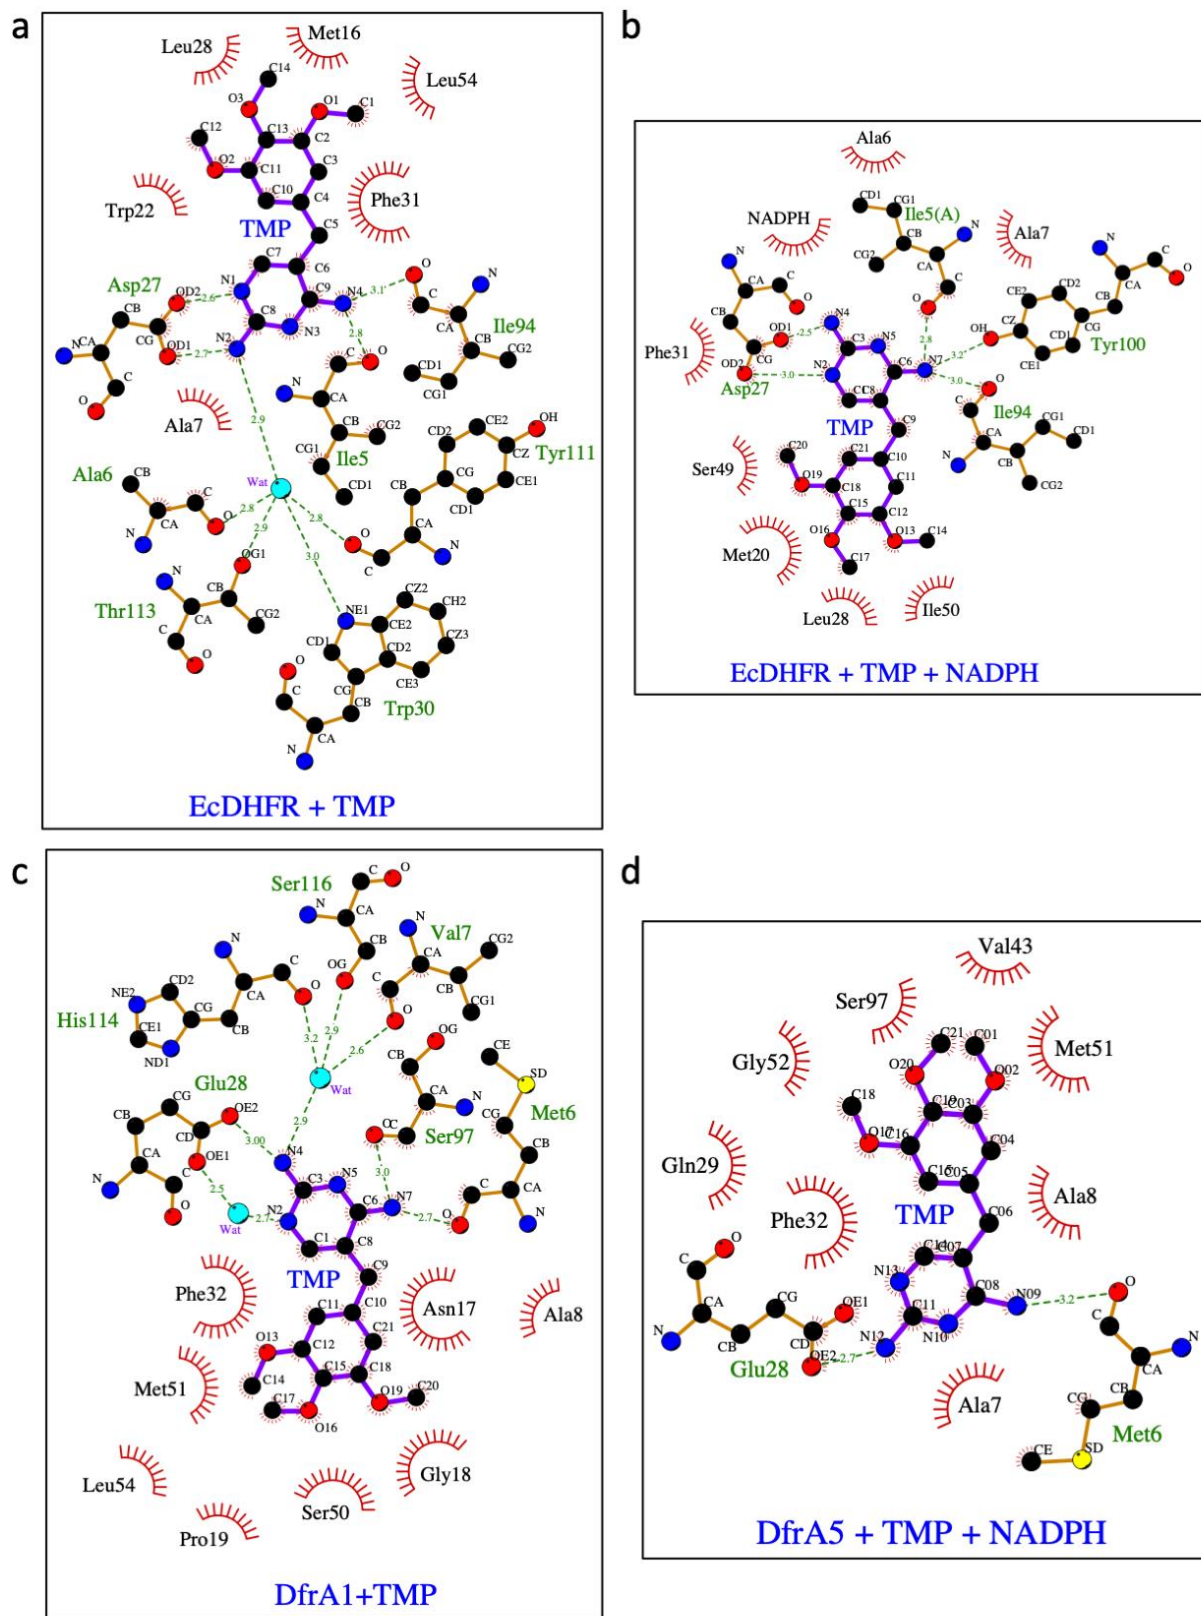

**Supplementary Figure S10. Ligand-protein interaction diagrams for TMP-protein interactions from the crystal structures presented in this study.** The complexes are: **a** EcdHFR:TMP (PDB entry 7NAE), **b** EcdHFR:TMP:NADPH (7MYM), **c** DfrA1:TMP (7MYL), **d** DfrA5:TMP:NADPH (7R6G). Residues involved in van der Waals contacts are depicted as red spoked arcs. Hydrogen bonds are shown as green dotted lines. Only conserved water molecules are included and are shown in cyan.

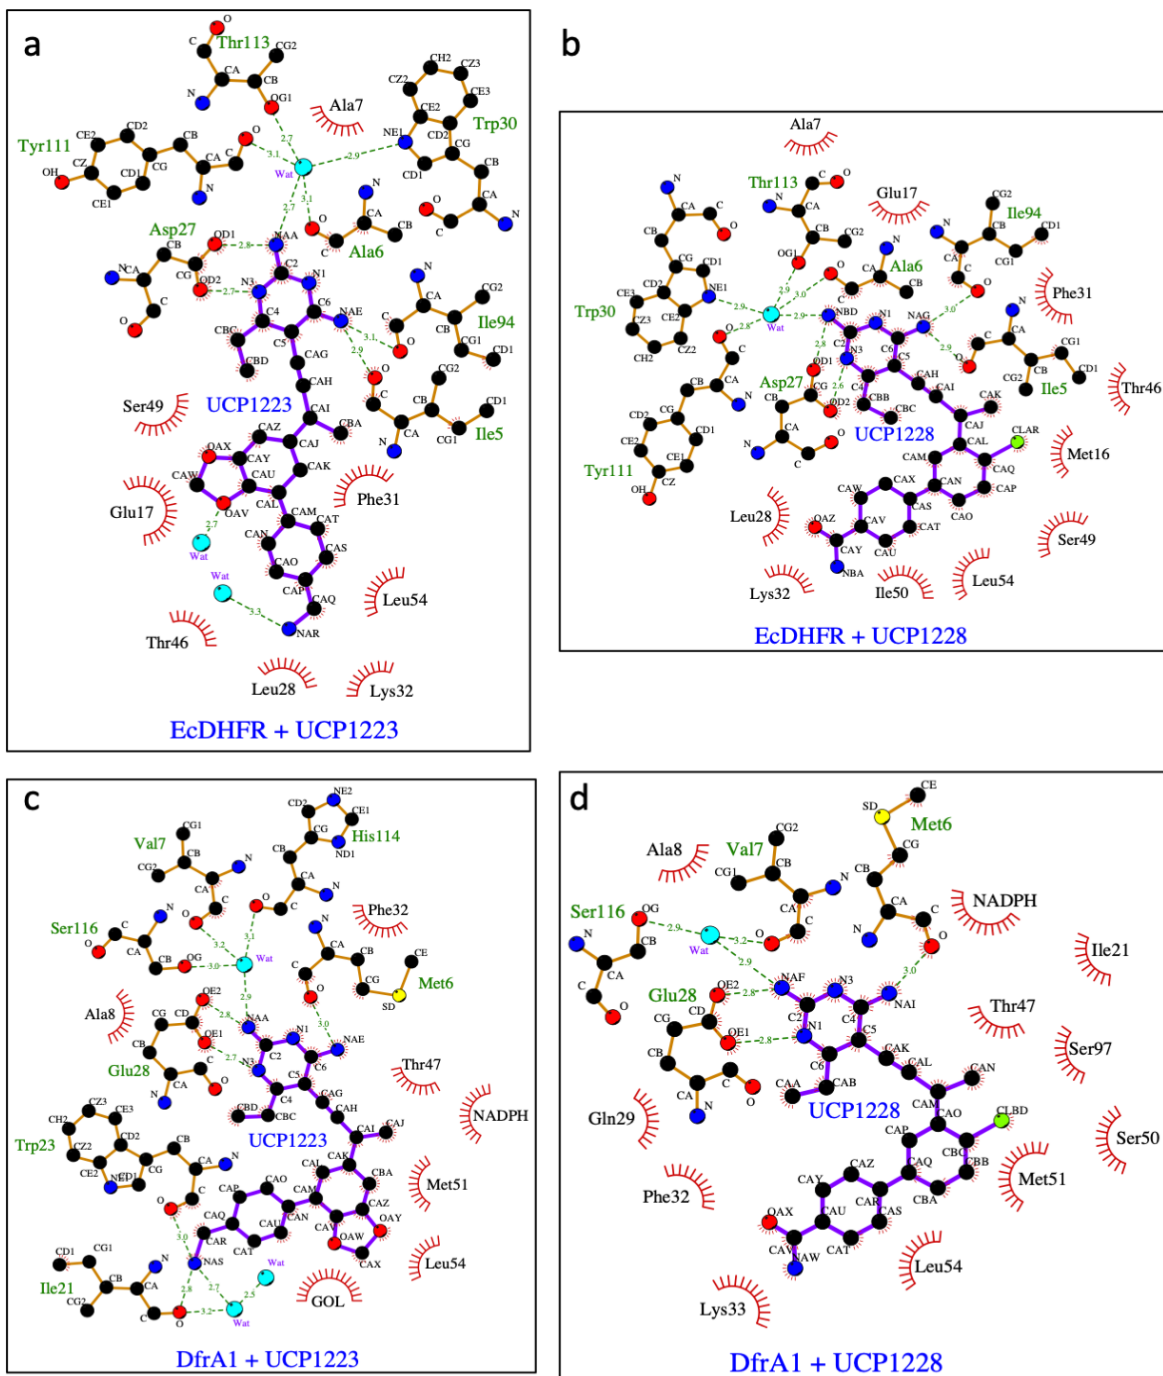

**Supplementary Figure S11. Ligand-protein interaction diagrams for UCP1223 and UCP1228-protein interactions from the crystal structures presented in this study.** The complexes are: **a** EcdHFR:UCP1223 (PDB entry 7REB), **b** EcdHFR:UCP1228:NADPH (7MQP), **c** DfrA1:UCP1223:NADPH (7RGJ), **d** DfrA1:UCP1228:NADPH (7REG). Residues involved in van der Waals contacts are depicted as red spoked arcs. Hydrogen bonds are shown as green dotted lines. Only conserved water molecules are included and are shown in cyan.

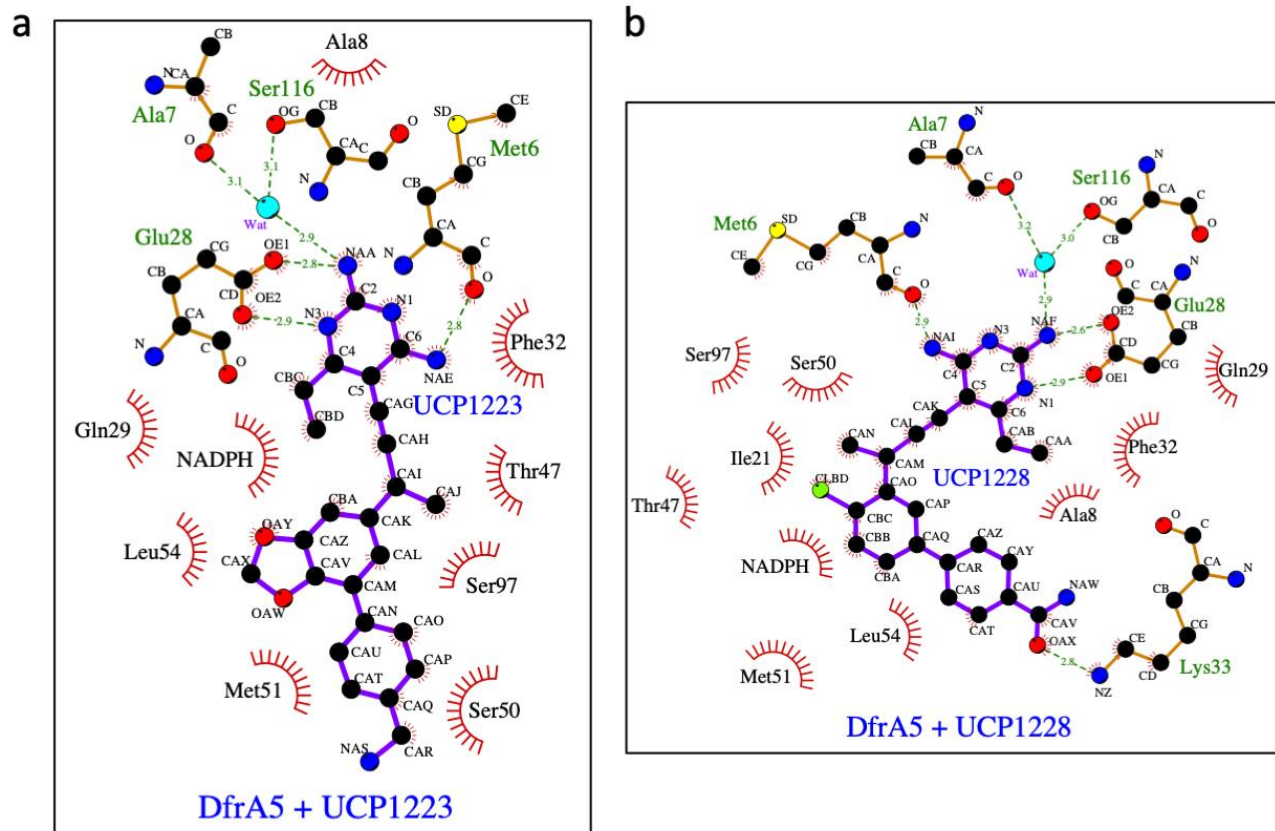

**Supplementary Figure S12. Ligand-protein interaction diagrams for UCP1223 and UCP1228-protein interactions from the crystal structures of DfrA5 presented in this study.** The complexes are: **a** DfrA5:UCP1223:NADPH (PDB entry 7RGK) **b** DfrA5:UCP1228:NADPH (7RGO). Residues involved in van der Waals contacts are depicted as red spoked arcs. Hydrogen bonds are shown as green dotted lines. Only conserved water molecules are included and are shown in cyan.



a

| Compound ID | MIC ( $\mu\text{g}/\text{mL}$ ) <sup>a</sup> |                      |                    | MIC ( $\mu\text{g}/\text{mL}$ ) <sup>a</sup> |                   |                    |
|-------------|----------------------------------------------|----------------------|--------------------|----------------------------------------------|-------------------|--------------------|
|             | BW25113<br>w/o SMX                           | JW0451<br>w/o<br>SMX | Fold<br>difference | BW25113<br>w/o SMX                           | BW25113<br>w/ SMX | Fold<br>difference |
| TMP         | 0.312                                        | 0.04                 | 8                  | 0.312                                        | 0.078             | 4                  |
| UCP1223     | 20                                           | 0.625                | 32                 | 20                                           | 0.625             | 32                 |
| UCP1228     | 10                                           | 1.25                 | 8                  | 10                                           | 0.625             | 16                 |

b

| Compound ID | MIC ( $\mu\text{g}/\text{mL}$ ) <sup>a</sup> |                           |                           | MIC ( $\mu\text{g}/\text{mL}$ ) <sup>a</sup> |                           |                           |
|-------------|----------------------------------------------|---------------------------|---------------------------|----------------------------------------------|---------------------------|---------------------------|
|             | <i>EcDHFR</i> <sup>b</sup>                   | <i>DfrA1</i> <sup>c</sup> | <i>DfrA5</i> <sup>d</sup> | <i>EcDHFR</i> <sup>b</sup>                   | <i>DfrA1</i> <sup>c</sup> | <i>DfrA5</i> <sup>d</sup> |
|             | w/o SMX                                      | w/o SMX                   | w/o SMX                   | w/ SMX                                       | w/ SMX                    | w/ SMX                    |
| TMP         | 0.625                                        | >20                       | >20                       | 0.078                                        | >20                       | >20                       |
| UCP1223     | 20                                           | >20                       | >20                       | 1.25                                         | 20                        | 10                        |
| UCP1228     | 20                                           | >20                       | >20                       | 1.25                                         | 20                        | 20                        |

**Supplementary Table S3. Comparative antimicrobial activities of TMP, UCP1223 and UCP1228 alone and paired with SMX (1:19) a** against *E. coli* BW25113 ATTC strain and *E. coli* JW0451 *acrB* mutant strain, **b** *E. coli* BL21(DE3) strain overexpressing *EcDHFR* wt, *DfrA1* and *DfrA5* respectively. <sup>a</sup>The Minimum Inhibitory Concentration (MIC) values represent 80% inhibition of bacterial growth after 18 to 20 hours of incubation at 37°C from duplicates. <sup>b</sup>BL21(DE3) strain transformed with pET41a-*EcDHFR* wt plasmid, <sup>c</sup>BL21(DE3) strain transformed with pET41a-*DfrA1* plasmid and <sup>d</sup>BL21(DE3) strain transformed with pET24a-*DfrA5* plasmid.
